# Supplementary material
Source: HighWire-hosted journal article supplement (https://bmjpaedsopen.bmj.com/content/3/1/e000470)
Supplement: inline-supplementary-material-1 [file inline-supplementary-material-1.docx]

Appendix table 1. The WHO 10th Revision of the International Classification of Disease

(ICD-10) Codes

| Definition | ICD-10 codes |
| --- | --- |
| Central Nervous System Anomaly |  |
| Microcephaly | Q02 |
| Anencephaly | Q00.0-Q00.2, |
| Spina bifida or meningomyelocele | Q05.0-Q05.9 |
| Encephalocele and inencephaly | Q01.0-Q01.2, Q01.8, Q01.9 |
| Other central nervous system anomalies | Q03, Q04, Q06, Q07 |
| Congenital heart disease | Q20.0-Q24.9, Q25.1-Q26.4, Q26.8, Q26.9 |
| Other congenital anomalies | Q00-Q99 but not listed in above |
| Intrauterine growth restriction | P05.1, P05.9 |
| TORCH | O26.4,O35.3,O35.8 |
| Genital/reproductive infections |  |
| Syphilis | O98.1, A50-A53 |
| Gonorrhoea | O98.2, A54 |
| Other infections with sexual mode of transmission | O98.3, A55-A64,A70-A74, A75-A99 |
| Maternal congenital anomaly | Q00-Q99 |
| Diabetes mellitus | E10, E11,O24 |
| Preeclampsia/eclampsia | O14.1, O15.0 |
| Chronic illness | E66, F30-F39, G40, G41, G43 |
| Teratogens (prenatal and/or perinatal) | F10-F16, F18,F19, K29.2, K70, K85.2, K86.0, K86.9, O35.4, O35.5, R78.1-R78.5,T51.0,X42,X45, X62, X65, Y12, Y15, Z50.2,Z71.4, Z71.5, Z72.1,Z72.2, Z86.4 |
| Neonatal morbidity |  |
| Necrotising enterocolitis | P77 |
| Intracranial haemorrhage | P52 |
| Bronchopulmonary dysplasia | P27.1 |
| Birth hypoxia | P20,P21 |
| Seizure | P90,P91 |
| Feeding difficulties | P92 |
| Respiratory distress syndrome | P22.0 |
| Infant in-hospital death | Hospital discharge summary |
